# Supplementary material
Source: HighWire-hosted journal article supplement (https://erj.ersjournals.com/content/56/1/2000202)
Supplement: inline-supplementary-material-1 [file inline-supplementary-material-1.pdf]

**Online supplementary material**

**Supplementary Table S1:** Distribution of our study population according to gestational age in comparison to Office for National Statistics (ONS) data 2010. ONS data includes all live births, CPRD data only includes patients surviving discharge from hospital and registering with primary care.

| <b>Gestational age (weeks)</b> | <b>ONS 2010, n (%)</b> | <b>Redefined CPRD population, n (%)</b> |
|--------------------------------|------------------------|-----------------------------------------|
| <24                            | 750 (0.11)             | 112 (0.04)                              |
| 24-27                          | 2,329 (0.33)           | 3706 (1.28)                             |
| 28-31                          | 5,757 (0.81)           | 5,552 (1.92)                            |
| 32-36                          | 41,914 (5.89)          | 19,342 (6.70)                           |
| 37-42                          | 630,797 (88.64)        | 259,148 (89.79)                         |
| Post-term, >42                 | 30,065 (4.22)          | 753 (0.26)                              |
| Total                          | 711,612                | 288,613                                 |

**Supplementary Table S2:** Distribution of our study population according to birthweight in comparison to Office for National Statistics (ONS) data 2010. ONS data includes all live births, CPRD data only includes patients surviving discharge from hospital and registering with primary care.

| <b>Birthweight<br/>(grams)</b> | <b>ONS 2010,<br/>n (%)</b> | <b>Redefined CPRD population,<br/>n (%)</b> |
|--------------------------------|----------------------------|---------------------------------------------|
| <1000                          | 4,170 (0.58)               | 586 (0.20)                                  |
| 1000-1499                      | 4,591 (0.64)               | 1,883 (0.65)                                |
| 1500-2499                      | 41,484 (5.82)              | 18,977 (6.58)                               |
| 2500-3999                      | 581,253 (81.50)            | 239,041 (82.82)                             |
| >4000                          | 81,759 (11.46)             | 28,126 (9.75)                               |
| Total                          | 713,257                    | 288,613                                     |

**Supplementary Table S3:** Incidence rates and incidence rate ratios of respiratory tract infections (RTI) between groups of children

|                                  | <b>Term: <math>\geq 37/40</math> and <math>\geq 2500</math>g</b> |                                              | <b>Preterm: <math>&lt; 32/40</math> and <math>&lt; 1500</math> g</b> |                                              |                                    |                |                                              |                |
|----------------------------------|------------------------------------------------------------------|----------------------------------------------|----------------------------------------------------------------------|----------------------------------------------|------------------------------------|----------------|----------------------------------------------|----------------|
|                                  | <b>Events</b>                                                    | <b>Rate per 10 person years<br/>(95% CI)</b> | <b>Events</b>                                                        | <b>Rate per 10 person years<br/>(95% CI)</b> | <b>Unadjusted IRR<br/>(95% CI)</b> | <b>P value</b> | <b>Adjusted IRR<sup>#</sup><br/>(95% CI)</b> | <b>P value</b> |
| <b>Overall</b>                   | 451,438                                                          | 7.17 (7.15-7.19)                             | 4,940                                                                | 9.69 (9.42-9.96)                             | 1.35 (1.31-1.39)                   | <0.001         | 1.37 (1.33-1.42)                             | <0.001         |
| <b>Age (years)</b>               |                                                                  |                                              |                                                                      |                                              |                                    |                |                                              |                |
| 0-1                              | 172,887                                                          | 10.17 (10.13-10.22)                          | 1,601                                                                | 12.65 (12.05-13.29)                          | 1.24 (1.18-1.31)                   | <0.001         | 1.21 (1.15-1.28)                             | <0.001         |
| 1-2                              | 126,278                                                          | 8.09 (8.04-8.13)                             | 1,463                                                                | 11.66 (11.07-12.27)                          | 1.44 (1.37-1.52)                   | <0.001         | 1.50 (1.40-1.61)                             | <0.001         |
| 2-3                              | 70,146                                                           | 5.60 (5.56-5.65)                             | 886                                                                  | 8.70 (8.14-9.29)                             | 1.55 (1.45-1.66)                   | <0.001         | 1.59 (1.45-1.75)                             | <0.001         |
| 3-4                              | 49,911                                                           | 4.99 (4.96-5.04)                             | 595                                                                  | 7.01 (6.47-7.6)                              | 1.40 (1.29-1.53)                   | <0.001         | 1.41 (1.26-1.57)                             | <0.001         |
| 4-5                              | 32,216                                                           | 4.09 (4.05-4.14)                             | 395                                                                  | 5.56 (5.03-6.13)                             | 1.36 (1.23-1.50)                   | <0.001         | 1.36 (1.19-1.57)                             | <0.001         |
| <b>Sex</b>                       |                                                                  |                                              |                                                                      |                                              |                                    |                |                                              |                |
| Male                             | 245,307                                                          | 7.53 (7.50-7.56)                             | 2,464                                                                | 10.0 (9.61-10.4)                             | 1.33 (1.28-1.38)                   | <0.001         | 1.33 (1.27-1.40)                             | <0.001         |
| Female                           | 206,131                                                          | 6.78 (6.75-6.81)                             | 2,476                                                                | 9.40 (9.03-9.77)                             | 1.39 (1.33-1.44)                   | <0.001         | 1.42 (1.35-1.49)                             | <0.001         |
| <b>IMD 2010 quintile</b>         |                                                                  |                                              |                                                                      |                                              |                                    |                |                                              |                |
| 1 (least deprived)               | 98,082                                                           | 7.14 (7.10-7.18)                             | 803                                                                  | 8.77 (8.19-9.40)                             | 1.23 (1.14-1.32)                   | <0.001         | 1.25 (1.15-1.36)                             | <0.001         |
| 2                                | 90,665                                                           | 6.99 (6.95-7.04)                             | 1,020                                                                | 9.44 (8.88-10.04)                            | 1.35 (1.27-1.44)                   | <0.001         | 1.37 (1.27-1.48)                             | <0.001         |
| 3                                | 81,032                                                           | 7.01 (6.96-7.06)                             | 879                                                                  | 9.58 (8.96-10.23)                            | 1.37 (1.28-1.46)                   | <0.001         | 1.43 (1.32-1.55)                             | <0.001         |
| 4                                | 89,677                                                           | 7.19 (7.15-7.24)                             | 1,068                                                                | 10.09 (9.50-10.72)                           | 1.40 (1.32-1.49)                   | <0.001         | 1.41 (1.30-1.52)                             | <0.001         |
| 5 (most deprived)                | 91,274                                                           | 7.51 (7.46-7.56)                             | 1,157                                                                | 10.39 (9.80-11.00)                           | 1.38 (1.30-1.47)                   | <0.001         | 1.40 (1.30-1.51)                             | <0.001         |
| Missing                          | 708                                                              | 7.84 (7.28-8.44)                             | 13                                                                   | 9.99 (5.80-17.20)                            | 1.27 (0.67-2.19)                   | 0.19           | 1.07 (0.55-2.09)                             | 0.84           |
| <b>Congenital anomalies (CA)</b> |                                                                  |                                              |                                                                      |                                              |                                    |                |                                              |                |
| No CA                            | 437,238                                                          | 7.13 (7.11-7.15)                             | 3,805                                                                | 9.39 (9.09-9.69)                             | 1.32 (1.28-1.36)                   | <0.001         | 1.40 (1.35-1.45)                             | <0.001         |
| Has CA                           | 14,200                                                           | 8.69 (8.55-8.84)                             | 1,135                                                                | 10.86 (10.24-11.51)                          | 1.25 (1.17-1.33)                   | <0.001         | 1.28 (1.19-1.38)                             | <0.001         |

<sup>#</sup> Adjusted for age, sex, IMD 2010 quintile, congenital anomalies; CI= confidence interval; IRR= incidence rate ratio

**Supplementary Table S4:** Incidence rates and incidence rate ratios of lower respiratory tract infections (LRTI) between groups of children

|                                  | Term: $\geq 37/40$ and $\geq 2500$ g |                                      | Preterm: $< 32/40$ and $< 1500$ g |                                      |                            |         |                                       |         |
|----------------------------------|--------------------------------------|--------------------------------------|-----------------------------------|--------------------------------------|----------------------------|---------|---------------------------------------|---------|
|                                  | Events                               | Rate per 10 person years<br>(95% CI) | Events                            | Rate per 10 person years<br>(95% CI) | Unadjusted IRR<br>(95% CI) | P value | Adjusted IRR <sup>#</sup><br>(95% CI) | P value |
| <b>Overall</b>                   | 71,929                               | 1.14 (1.13-1.15)                     | 1,397                             | 2.74 (2.60-2.89)                     | 2.40 (2.27-2.53)           | <0.001  | 2.79 (2.59-3.01)                      | <0.001  |
| <b>Age (years)</b>               |                                      |                                      |                                   |                                      |                            |         |                                       |         |
| 0-1                              | 29,630                               | 1.74 (1.72-1.76)                     | 520                               | 2.36 (2.16-2.57)                     | 2.36 (2.16-2.57)           | <0.001  | 2.36 (2.13-2.61)                      | <0.001  |
| 1-2                              | 20,645                               | 1.32 (1.30-1.34)                     | 422                               | 3.36 (3.06-3.70)                     | 2.54 (2.30-2.80)           | <0.001  | 3.61 (3.02-4.32)                      | <0.001  |
| 2-3                              | 10,753                               | 0.86 (0.84-0.88)                     | 227                               | 2.23 (1.96-2.54)                     | 2.59 (2.26-2.96)           | <0.001  | 3.39 (2.71-4.24)                      | <0.001  |
| 3-4                              | 6,794                                | 0.68 (0.66-0.70)                     | 145                               | 1.71 (1.45-2.01)                     | 2.51 (2.11-2.96)           | <0.001  | 3.36 (2.55-4.43)                      | <0.001  |
| 4-5                              | 4,107                                | 0.52 (0.51-0.54)                     | 83                                | 1.17 (0.94-1.45)                     | 2.24 (1.78-2.78)           | <0.001  | 2.52 (1.79-3.54)                      | <0.001  |
| <b>Sex</b>                       |                                      |                                      |                                   |                                      |                            |         |                                       |         |
| Male                             | 41,097                               | 1.26 (1.25-1.27)                     | 701                               | 2.84 (2.64-3.06)                     | 2.26 (2.09-2.43)           | <0.001  | 2.59 (2.33-2.88)                      | <0.001  |
| Female                           | 30,832                               | 1.01 (1.00-1.03)                     | 696                               | 2.64 (2.45-2.85)                     | 2.60 (2.41-2.81)           | <0.001  | 3.01 (2.71-3.35)                      | <0.001  |
| <b>IMD 2010 quintile</b>         |                                      |                                      |                                   |                                      |                            |         |                                       |         |
| 1 (least deprived)               | 15,486                               | 1.13 (1.11-1.15)                     | 232                               | 2.53 (2.23-2.88)                     | 2.25 (1.97-2.56)           | <0.001  | 2.58 (2.16-3.08)                      | <0.001  |
| 2                                | 14,261                               | 1.10 (1.08-1.12)                     | 286                               | 2.65 (2.36-2.97)                     | 2.41 (2.13-2.71)           | <0.001  | 2.82 (2.39-3.33)                      | <0.001  |
| 3                                | 12,748                               | 1.10 (1.08-1.12)                     | 235                               | 2.56 (2.25-2.91)                     | 2.32 (2.03-2.64)           | <0.001  | 2.77 (2.31-3.33)                      | <0.001  |
| 4                                | 14,344                               | 1.15 (1.13-1.17)                     | 290                               | 2.74 (2.44-3.07)                     | 2.38 (2.11-2.68)           | <0.001  | 2.70 (2.28-3.19)                      | <0.001  |
| 5 (most deprived)                | 14,989                               | 1.23 (1.21-1.25)                     | 349                               | 3.13 (2.82-3.48)                     | 2.54 (2.28-2.83)           | <0.001  | 3.03 (2.60-3.53)                      | <0.001  |
| Missing                          | 101                                  | 1.12 (0.92-1.36)                     | 5                                 | 3.84 (1.60-9.28)                     | 3.43 (1.09-8.28)           | 0.01    | 3.61 (0.78-16.77)                     | 0.10    |
| <b>Congenital anomalies (CA)</b> |                                      |                                      |                                   |                                      |                            |         |                                       |         |
| No CA                            | 69,240                               | 1.13 (1.12-1.14)                     | 1,029                             | 2.54 (2.39-2.70)                     | 2.25 (2.11-2.39)           | <0.001  | 2.84 (2.61-3.09)                      | <0.001  |
| Has CA                           | 2,689                                | 1.64 (1.59-1.71)                     | 368                               | 3.52 (3.18-3.90)                     | 2.14 (1.91-2.39)           | <0.001  | 2.60 (2.22-3.03)                      | <0.001  |

<sup>#</sup> Adjusted for age, sex, IMD 2010 quintile, congenital anomalies; CI= confidence interval; IRR= incidence rate ratio

**Supplementary Table S5:** Incidence rates and incidence rate ratios of wheeze between groups of children

|                                  | Term: $\geq 37/40$ and $\geq 2500$ g |                                   | Preterm: $< 32/40$ and $< 1500$ g |                                   |                         |         |                                    |         |
|----------------------------------|--------------------------------------|-----------------------------------|-----------------------------------|-----------------------------------|-------------------------|---------|------------------------------------|---------|
|                                  | Events                               | Rate per 10 person years (95% CI) | Events                            | Rate per 10 person years (95% CI) | Unadjusted IRR (95% CI) | P value | Adjusted IRR <sup>#</sup> (95% CI) | P value |
| <b>Overall</b>                   | 32,529                               | 0.52 (0.51-0.52)                  | 608                               | 1.19 (1.10-1.29)                  | 2.31 (2.13-2.50)        | <0.001  | 3.05 (2.64-3.52)                   | <0.001  |
| <b>Age (years)</b>               |                                      |                                   |                                   |                                   |                         |         |                                    |         |
| 0-1                              | 13,336                               | 0.78 (0.77-0.80)                  | 218                               | 1.72 (1.51-1.97)                  | 2.20 (1.91-2.51)        | <0.001  | 2.33 (1.93-2.81)                   | <0.001  |
| 1-2                              | 9,695                                | 0.62 (0.61-0.63)                  | 234                               | 1.86 (1.64-2.12)                  | 3.00 (2.63-3.42)        | <0.001  | 5.97 (4.27-8.36)                   | <0.001  |
| 2-3                              | 4,858                                | 0.39 (0.38-0.40)                  | 92                                | 0.90 (0.74-1.11)                  | 2.33 (1.87-2.86)        | <0.001  | 3.88 (2.41-6.25)                   | <0.001  |
| 3-4                              | 3,016                                | 0.30 (0.29-0.31)                  | 40                                | 0.47 (0.35-0.64)                  | 1.56 (1.11-2.13)        | 0.004   | 1.60 (0.96-2.68)                   | 0.07    |
| 4-5                              | 1,624                                | 0.21 (0.20-0.22)                  | 24                                | 0.34 (0.23-0.50)                  | 1.64 (1.05-2.44)        | 0.01    | 2.00 (0.98-4.07)                   | 0.06    |
| <b>Sex</b>                       |                                      |                                   |                                   |                                   |                         |         |                                    |         |
| Male                             | 20,813                               | 0.64 (0.63-0.65)                  | 371                               | 1.51 (1.36-1.67)                  | 2.36 (2.12-2.61)        | <0.001  | 3.04 (2.51-3.67)                   | <0.001  |
| Female                           | 11,716                               | 0.39 (0.38-0.39)                  | 237                               | 0.90 (0.79-1.02)                  | 2.33 (2.04-2.65)        | <0.001  | 3.18 (2.51-4.02)                   | <0.001  |
| <b>IMD 2010 quintile</b>         |                                      |                                   |                                   |                                   |                         |         |                                    |         |
| 1 (least deprived)               | 7,358                                | 0.54 (0.52-0.55)                  | 102                               | 1.11 (0.92-1.35)                  | 2.08 (1.69-2.53)        | <0.001  | 2.49 (1.76-3.52)                   | <0.001  |
| 2                                | 6,522                                | 0.50 (0.49-0.52)                  | 135                               | 1.25 (1.06-1.48)                  | 2.48 (2.08-2.95)        | <0.001  | 3.37 (2.46-4.63)                   | <0.001  |
| 3                                | 5,835                                | 0.50 (0.49-0.52)                  | 108                               | 1.18 (0.97-1.42)                  | 2.33 (1.91-2.82)        | <0.001  | 3.23 (2.29-4.56)                   | <0.001  |
| 4                                | 6,101                                | 0.49 (0.48-0.50)                  | 106                               | 1.00 (0.83-1.21)                  | 2.05 (1.67-2.48)        | <0.001  | 2.52 (1.82-3.48)                   | <0.001  |
| 5 (most deprived)                | 6,648                                | 0.55 (0.53-0.56)                  | 156                               | 1.40 (1.20-1.64)                  | 2.56 (2.17-3.00)        | <0.001  | 3.77 (2.83-5.04)                   | <0.001  |
| Missing                          | 65                                   | 0.72 (0.56-0.92)                  | 1                                 | 0.77 (0.11-5.45)                  | 1.07 (0.03-6.16)        | 0.43    | 1.09 (0.05-24.11)                  | 0.96    |
| <b>Congenital anomalies (CA)</b> |                                      |                                   |                                   |                                   |                         |         |                                    |         |
| No CA                            | 31,456                               | 0.51 (0.51-0.52)                  | 443                               | 1.09 (1.00-1.20)                  | 2.13 (1.94-2.34)        | <0.001  | 2.99 (2.53-3.52)                   | <0.001  |
| Has CA                           | 1,073                                | 0.66 (0.62-0.70)                  | 165                               | 1.58 (1.36-1.84)                  | 2.40 (2.03-2.83)        | <0.001  | 3.37 (2.56-4.45)                   | <0.001  |

<sup>#</sup> Adjusted for age, sex, IMD 2010 quintile, congenital anomalies; CI= confidence interval; IRR= incidence rate ratio

**Supplementary Table S6:** Incidence rates and incidence rate ratios of antibiotic prescriptions between groups of children

|                                  | Term: $\geq 37/40$ and $\geq 2500\text{g}$ |                                   | Preterm: $< 32/40$ and $< 1500\text{g}$ |                                   |                         |         |                                    |         |
|----------------------------------|--------------------------------------------|-----------------------------------|-----------------------------------------|-----------------------------------|-------------------------|---------|------------------------------------|---------|
|                                  | Events                                     | Rate per 10 person years (95% CI) | Events                                  | Rate per 10 person years (95% CI) | Unadjusted IRR (95% CI) | P value | Adjusted IRR <sup>#</sup> (95% CI) | P value |
| <b>Overall</b>                   | 711,743                                    | 8.40 (8.38-8.42)                  | 6,971                                   | 12.67 (12.38-12.97)               | 1.51 (1.47-1.54)        | <0.001  | 1.49 (1.44-1.55)                   | <0.001  |
| <b>Age (years)</b>               |                                            |                                   |                                         |                                   |                         |         |                                    |         |
| 0-1                              | 180,426                                    | 8.15 (8.11-8.19)                  | 1,401                                   | 10.30 (9.77-10.85)                | 1.26 (1.20-1.33)        | <0.001  | 1.14 (1.07-1.22)                   | <0.001  |
| 1-2                              | 212,120                                    | 10.29 (10.25-10.34)               | 2,155                                   | 15.96 (15.30-16.65)               | 1.55 (1.49-1.62)        | <0.001  | 1.55 (1.45-1.66)                   | <0.001  |
| 2-3                              | 135,874                                    | 8.06 (8.01-8.10)                  | 1,475                                   | 13.36 (12.69-14.05)               | 1.66 (1.57-1.74)        | <0.001  | 1.75 (1.60-1.90)                   | <0.001  |
| 3-4                              | 108,033                                    | 7.82 (7.77-7.86)                  | 1,113                                   | 12.11 (11.42-12.85)               | 1.55 (1.46-1.64)        | <0.001  | 1.53 (1.39-1.68)                   | <0.001  |
| 4-5                              | 75,290                                     | 6.68 (6.63-6.72)                  | 827                                     | 10.76 (10.05-11.52)               | 1.61 (1.50-1.73)        | <0.001  | 1.66 (1.48-1.86)                   | <0.001  |
| <b>Sex</b>                       |                                            |                                   |                                         |                                   |                         |         |                                    |         |
| Male                             | 389,818                                    | 8.89 (8.86-8.91)                  | 3,692                                   | 13.76 (13.32-14.21)               | 1.55 (1.50-1.60)        | <0.001  | 1.54 (1.46-1.62)                   | <0.001  |
| Female                           | 321,925                                    | 7.88 (7.85-7.91)                  | 3,279                                   | 11.63 (11.24-12.04)               | 1.48 (1.43-1.53)        | <0.001  | 1.45 (1.37-1.53)                   | <0.001  |
| <b>IMD 2010 quintile</b>         |                                            |                                   |                                         |                                   |                         |         |                                    |         |
| 1 (least deprived)               | 161,597                                    | 8.40 (8.36-8.44)                  | 1,266                                   | 12.83 (12.14-13.55)               | 1.53 (1.44-1.61)        | <0.001  | 1.70 (1.56-1.86)                   | <0.001  |
| 2                                | 147,517                                    | 8.35 (8.31-8.39)                  | 1,397                                   | 12.43 (11.80-13.55)               | 1.49 (1.41-1.57)        | <0.001  | 1.48 (1.36-1.61)                   | <0.001  |
| 3                                | 129,433                                    | 8.36 (8.31-8.41)                  | 1,267                                   | 12.48 (11.82-13.19)               | 1.49 (1.41-1.58)        | <0.001  | 1.43 (1.31-1.55)                   | <0.001  |
| 4                                | 138,038                                    | 8.49 (8.45-8.54)                  | 1,530                                   | 13.34 (12.69-14.02)               | 1.57 (1.49-1.65)        | <0.001  | 1.49 (1.38-1.61)                   | <0.001  |
| 5 (most deprived)                | 134,113                                    | 8.40 (8.36-8.45)                  | 1,500                                   | 12.33 (11.72-12.97)               | 1.47 (1.39-1.54)        | <0.001  | 1.42 (1.32-1.54)                   | <0.001  |
| Missing                          | 1,045                                      | 8.81 (8.29-9.36)                  | 11                                      | 8.45 (4.68-15.26)                 | -0.04 (-0.54-0.47)      | 0.46    | 0.64 (0.30-1.38)                   | 0.26    |
| <b>Congenital anomalies (CA)</b> |                                            |                                   |                                         |                                   |                         |         |                                    |         |
| No CA                            | 679,215                                    | 8.24 (8.22-8.26)                  | 5,203                                   | 11.87 (11.55-12.19)               | 1.44 (1.40-1.48)        | <0.001  | 1.65 (1.58-1.72)                   | <0.001  |
| Has CA                           | 32,528                                     | 14.42 (14.26-14.58)               | 1,768                                   | 15.82 (15.10-16.57)               | 1.10 (1.05-1.15)        | <0.001  | 1.06 (0.98-1.15)                   | 0.13    |

<sup>#</sup> Adjusted for age, sex, IMD 2010 quintile, congenital anomalies; CI= confidence interval; IRR= incidence rate ratio

**Supplementary Table S7:** Incidence rates of antibiotic prescriptions (by antibiotics class) between groups of children

|                                                 | Term    |                                      | PT-Air |                                      | PT-O <sub>2</sub> |                                      |
|-------------------------------------------------|---------|--------------------------------------|--------|--------------------------------------|-------------------|--------------------------------------|
|                                                 | Events  | Rate per 10 person years<br>(95% CI) | Events | Rate per 10 person years<br>(95% CI) | Events            | Rate per 10 person years<br>(95% CI) |
| <b>Overall</b>                                  | 711,743 | 8.40 (8.38-8.42)                     | 4,768  | 11.63 (11.31-11.97)                  | 2,203             | 15.71 (15.06-16.38)                  |
| <b>Class of antibiotics</b>                     |         |                                      |        |                                      |                   |                                      |
| Broad-spectrum penicillins                      | 704,503 | 8.32 (8.30-8.34)                     | 4,496  | 10.97 (10.65-11.29)                  | 1,923             | 13.71 (13.11-14.34)                  |
| Macrolides                                      | 138,507 | 1.64 (1.63-1.64)                     | 956    | 2.33 (2.19-2.48)                     | 415               | 2.96 (2.69-3.26)                     |
| Benzylpenicillin and<br>phenoxymethylpenicillin | 97,269  | 1.15 (1.14-1.16)                     | 411    | 1.00 (0.91-1.10)                     | 160               | 1.14 (0.98-1.33)                     |
| Penicillinase-resistant<br>penicillins          | 62,918  | 0.74 (0.74-0.75)                     | 272    | 0.66 (0.59-0.75)                     | 77                | 0.55 (0.44-0.69)                     |
| Sulphonamides and<br>trimethoprim               | 52,317  | 0.62 (0.61-0.62)                     | 469    | 1.14 (1.05-1.25)                     | 223               | 1.59 (1.39-1.81)                     |
| Cephalosporins                                  | 33,356  | 0.39 (0.39-0.40)                     | 315    | 0.77 (0.69-0.86)                     | 204               | 1.45 (1.27-1.67)                     |

**Supplementary Table S8:** Incidence rate ratios of consultations for lower respiratory tract infections (LRTI) and antibiotic prescriptions (Abx Px) between children in PT-Air and PT-O<sub>2</sub>

|                             | Lower Respiratory Tract Infections |         |                                       |         | Antibiotic Prescriptions (Abx Px) |         |                                       |         |
|-----------------------------|------------------------------------|---------|---------------------------------------|---------|-----------------------------------|---------|---------------------------------------|---------|
|                             | Unadjusted IRR<br>(95% CI)         | P value | Adjusted IRR <sup>#</sup><br>(95% CI) | P value | Unadjusted IRR<br>(95% CI)        | P value | Adjusted IRR <sup>#</sup><br>(95% CI) | P value |
| <b>Overall</b>              | 1.65 (1.48-1.85)                   | <0.001  | 1.74 (1.50-2.03)                      | <0.001  | 1.35 (1.28-1.42)                  | <0.001  | 1.39 (1.28-1.50)                      | <0.001  |
| <b>Age</b>                  |                                    |         |                                       |         |                                   |         |                                       |         |
| 0-1                         | 1.46 (1.21-1.75)                   | <0.001  | 1.39 (1.14-1.69)                      | 0.001   | 1.15 (1.02-1.29)                  | 0.009   | 1.12 (0.96-1.31)                      | 0.14    |
| 1-2                         | 1.56 (1.27-1.91)                   | <0.001  | 1.63 (1.19-2.25)                      | 0.003   | 1.35 (1.24-1.48)                  | <0.001  | 1.32 (1.15-1.52)                      | <0.001  |
| 2-3                         | 2.03 (1.55-2.67)                   | <0.001  | 2.65 (1.77-3.96)                      | <0.001  | 1.43 (1.28-1.60)                  | <0.001  | 1.51 (1.26-1.82)                      | <0.001  |
| 3-4                         | 1.61 (1.12-2.28)                   | 0.004   | 1.81 (1.02-3.23)                      | 0.04    | 1.43 (1.26-1.62)                  | <0.001  | 1.73 (1.40-2.14)                      | <0.001  |
| 4-5                         | 2.31 (1.45-3.64)                   | <0.001  | 2.58 (1.38-4.83)                      | 0.003   | 1.38 (1.19-1.61)                  | <0.001  | 1.38 (1.07-1.78)                      | 0.01    |
| <b>Sex</b>                  |                                    |         |                                       |         |                                   |         |                                       |         |
| Male                        | 1.87 (1.60-2.18)                   | <0.001  | 2.12 (1.73-2.61)                      | <0.001  | 1.45 (1.36-1.55)                  | <0.001  | 1.65 (1.49-1.83)                      | <0.001  |
| Female                      | 1.44 (1.22-1.69)                   | <0.001  | 1.43 (1.15-1.78)                      | 0.001   | 1.21 (1.12-1.30)                  | <0.001  | 1.33 (1.18-1.49)                      | <0.001  |
| <b>IMD 2010 quintile</b>    |                                    |         |                                       |         |                                   |         |                                       |         |
| 1 (least deprived)          | 1.66 (1.26-2.18)                   | <0.001  | 1.82 (1.29-2.56)                      | 0.001   | 1.57 (1.40-1.77)                  | <0.001  | 2.17 (1.77-2.65)                      | <0.001  |
| 2                           | 1.60 (1.25-2.04)                   | <0.001  | 1.57 (1.11-2.22)                      | 0.01    | 1.25 (1.12-1.40)                  | <0.001  | 1.25 (1.04-1.51)                      | 0.02    |
| 3                           | 1.88 (1.42-2.48)                   | <0.001  | 2.27 (1.57-3.27)                      | <0.001  | 1.34 (1.18-1.52)                  | <0.001  | 1.38 (1.15-1.66)                      | 0.001   |
| 4                           | 1.64 (1.28-2.09)                   | <0.001  | 1.61 (1.19-2.20)                      | 0.002   | 1.20 (1.07-1.34)                  | <0.001  | 1.06 (0.90-1.26)                      | 0.48    |
| 5 (most deprived)           | 1.54 (1.23-1.93)                   | <0.001  | 1.64 (1.21-2.23)                      | 0.002   | 1.46 (1.31-1.63)                  | <0.001  | 1.42 (1.21-1.67)                      | <0.001  |
| Missing                     | .                                  | 0.05    | .                                     | .       | 0.99 (0.25-4.63)                  | 0.49    | 1.01 (0.22-4.66)                      | 0.99    |
| <b>Congenital anomalies</b> |                                    |         |                                       |         |                                   |         |                                       |         |
| No CA                       | 1.57 (1.37-1.79)                   | <0.001  | 1.78 (1.49-2.14)                      | <0.001  | 1.20 (1.13-1.28)                  | <0.001  | 1.31 (1.19-1.44)                      | <0.001  |
| Has CA                      | 1.61 (1.30-1.99)                   | <0.001  | 1.66 (1.28-2.15)                      | <0.001  | 1.46 (1.33-1.61)                  | <0.001  | 1.58 (1.37-1.82)                      | <0.001  |

<sup>#</sup> Adjusted for age, sex, IMD 2010 quintile, congenital anomalies; CI= confidence interval; IRR= incidence rate ratio



**Supplementary Table S9:** Incidence rate ratios of consultations for respiratory tract infections (RTI) and wheeze between children in PT-Air and PT-O<sub>2</sub>

|                             | Respiratory Tract Infections (RTI) |         |                                       |         | Wheeze                     |         |                                       |         |
|-----------------------------|------------------------------------|---------|---------------------------------------|---------|----------------------------|---------|---------------------------------------|---------|
|                             | Unadjusted IRR<br>(95% CI)         | P value | Adjusted IRR <sup>#</sup><br>(95% CI) | P value | Unadjusted IRR<br>(95% CI) | P value | Adjusted IRR <sup>#</sup><br>(95% CI) | P value |
| <b>Overall</b>              | 1.22 (1.15-1.3)                    | <0.001  | 1.21 (1.12-1.30)                      | <0.001  | 1.18 (0.99-1.41)           | 0.03    | 1.10 (0.86-1.42)                      | 0.45    |
| <b>Age</b>                  |                                    |         |                                       |         |                            |         |                                       |         |
| 0-1                         | 1.05 (0.94-1.18)                   | 0.17    | 1.04 (0.93-1.16)                      | 0.52    | 0.91 (0.65-1.24)           | 0.27    | 0.84 (0.61-1.15)                      | 0.28    |
| 1-2                         | 1.26 (1.12-1.40)                   | <0.001  | 1.24 (1.07-1.45)                      | 0.004   | 1.22 (0.91-1.62)           | 0.08    | 1.16 (0.69-1.96)                      | 0.57    |
| 2-3                         | 1.23 (1.06-1.42)                   | 0.003   | 1.24 (1.03-1.50)                      | 0.02    | 1.75 (1.12-2.71)           | 0.01    | 1.81 (0.85-3.86)                      | 0.12    |
| 3-4                         | 1.37 (1.15-1.63)                   | <0.001  | 1.49 (1.17-1.90)                      | 0.001   | 1.09 (0.49-2.25)           | 0.39    | 1.21 (0.59-2.48)                      | 0.60    |
| 4-5                         | 1.43 (1.15-1.77)                   | <0.001  | 1.65 (1.21-2.25)                      | 0.002   | 1.24 (0.44-3.15)           | 0.31    | 1.16 (0.38-3.53)                      | 0.80    |
| <b>Sex</b>                  |                                    |         |                                       |         |                            |         |                                       |         |
| Male                        | 1.28 (1.18-1.39)                   | <0.001  | 1.28 (1.16-1.42)                      | <0.001  | 1.11 (0.88-1.39)           | 0.18    | 0.96 (0.70-1.31)                      | 0.79    |
| Female                      | 1.15 (1.05-1.26)                   | 0.001   | 1.13 (1.01-1.27)                      | 0.03    | 1.24 (0.92-1.65)           | 0.07    | 1.40 (0.90-2.19)                      | 0.13    |
| <b>IMD 2010 quintile</b>    |                                    |         |                                       |         |                            |         |                                       |         |
| 1 (least deprived)          | 1.12 (0.96-1.31)                   | 0.07    | 1.17 (0.98-1.41)                      | 0.09    | 1.24 (0.79-1.91)           | 0.16    | 1.53 (0.83-2.82)                      | 0.17    |
| 2                           | 1.15 (1.00-1.32)                   | 0.02    | 1.12 (0.94-1.33)                      | 0.20    | 1.37 (0.94-1.97)           | 0.04    | 1.03 (0.62-1.70)                      | 0.91    |
| 3                           | 1.49 (1.28-1.73)                   | <0.001  | 1.65 (1.37-1.98)                      | <0.001  | 1.16 (0.71-1.82)           | 0.26    | 1.15 (0.64-2.06)                      | 0.64    |
| 4                           | 1.18 (1.04-1.34)                   | 0.01    | 1.14 (0.98-1.34)                      | 0.01    | 1.77 (1.18-2.65)           | 0.002   | 1.68 (0.98-2.90)                      | 0.06    |
| 5 (most deprived)           | 1.21 (1.07-1.38)                   | 0.001   | 1.14 (0.98-1.33)                      | 0.09    | 0.75 (0.50-1.11)           | 0.07    | 0.61 (0.33-1.10)                      | 0.10    |
| Missing                     | 1.89 (0.49-10.70)                  | 0.17    | 0.58 (0.04-9.14)                      | 0.70    | .                          | .       | .                                     | .       |
| <b>Congenital anomalies</b> |                                    |         |                                       |         |                            |         |                                       |         |
| No CA                       | 1.15 (1.06-1.23)                   | <0.001  | 1.16 (1.06-1.27)                      | 0.001   | 1.08 (0.85-1.35)           | 0.26    | 1.15 (0.84-1.57)                      | 0.40    |
| Has CA                      | 1.32 (1.17-1.48)                   | <0.001  | 1.33 (1.16-1.53)                      | <0.001  | 1.11 (0.81-1.52)           | 0.25    | 1.02 (0.69-1.52)                      | 0.92    |

<sup>#</sup> Adjusted for age, sex, IMD 2010 quintile, congenital anomalies; CI= confidence interval; IRR= incidence rate ratio

**Supplementary Table S10:** Distribution of study population across two equal 8-year epochs

| <b>Epoch</b>              | <b>Epoch 1<br/>(1997-2005)</b> | <b>Epoch 2<br/>(2006-2014)</b> |         |
|---------------------------|--------------------------------|--------------------------------|---------|
| Term, n (%)               | 86,925 (99.2)                  | 164,686 (99.4)                 | 251,611 |
| PT-Air, n (%)             | 496 (0.6)                      | 721 (0.4)                      | 1,217   |
| PT-O <sub>2</sub> , n (%) | 135 (0.2)                      | 314 (0.2)                      | 449     |
| Total                     | 87,556                         | 165,721                        | 253,277 |
